# Supplementary material
Source: PubMed Central journal article supplement (PMC5374075)

# Full unedited gel for Figure 3

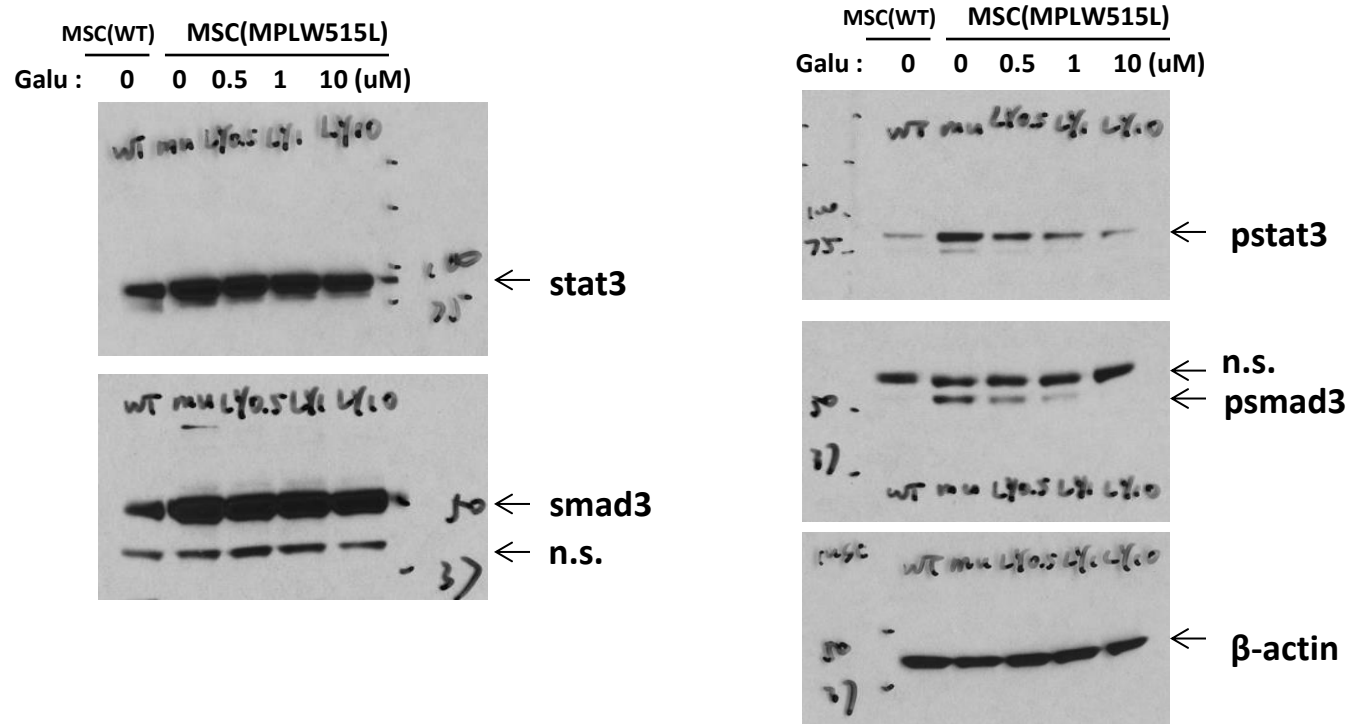

# Full unedited gel for Figure 5

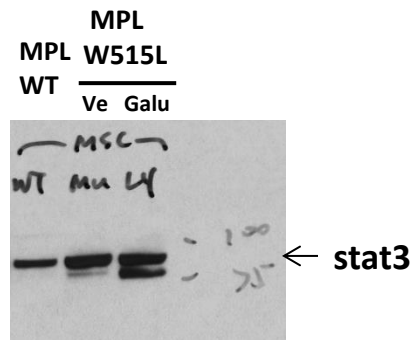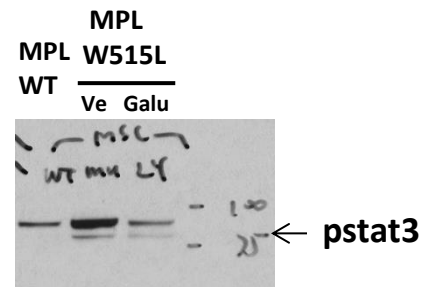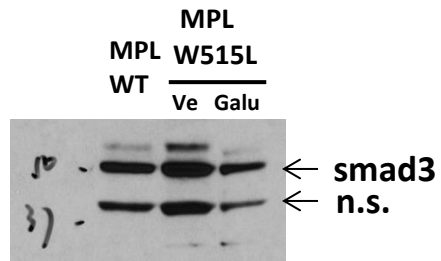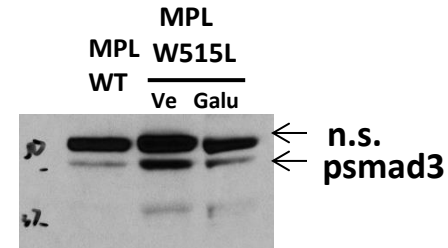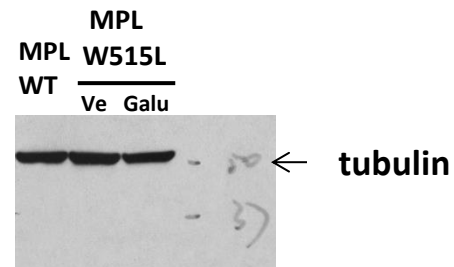

Supplement: jciinsight-2-90932-s001.pdf [file jciinsight-2-90932-s001.pdf]
